# Supplementary material for: A Study on the Association Between Early-Life Exposure to Famine and Sleep Quality in Adulthood：evidence from the China health and retirement longitudinal study database
Source: Research Square preprint supplement (doi:10.21203/rs.3.rs-7938543/v1), 2025-11-17
Supplement: Supplementary file 1 [file 710dcdbbd5ee5ec3bcfa2c1d.docx]

Annex

Table1 Criteria for evaluating adverse childhood experiences

| ACEs category | question | assignment |
| --- | --- | --- |
| Bullying | When you were a child, how often were you picked on or bullied by kids in your school/picked on or bullied by kids in your neighborhood? | 1=Often or Sometimes  0=Not very often or Never |
| corporal punishment | When you were growing up, did your male/female guardian ever hit you? | 1=Yes  0=No |
| domestic violence | Did your parents ever hit each other? | 1=Yes  0=No |
| Emotional neglect | How much love and affection did your female guardian give you while you were growing up? | 1=Rarely or Never  0=Often or Sometimes |
| Parental crime | During the years you were growing up,did your male/female guardian ever arrested or sent to prison? | 1=Yes  0=No |
| parents divorce | Were your biological parents divorced? | 1=Yes  0=No |
| Parental disability | Did your male/female guardian have a serious deformity when you were young? | 1=Yes  0=No |
| Parentalsub stance abuse | During the years you were growing up, did your male /female guardian ever alcoholismed or drugs | 1=Yes  0=No |
| The Parents are not in good spirits | Did your male /female guardian have abnormality of mind when you were young?had your male /female guardian showed continued signs of sadness or depression that lasted 2 weeks or more? | 1=Yes  0=No |
| Death of parent | Did you experience the death of your father/mother before you turned 17 | 1=Yes  0=No |
| The living environment is not safe | Was it safe being out alone at night in the neighborhood where you lived as a child? | 1=Not safe at all or not very safe  0=Very safe or somewhat safe |
|  |  |  |

ACEs：adverse childhood experience
